# Supplementary material for: Current knowledge on the immune microenvironment and emerging immunotherapies in diffuse midline glioma
Source: PubMed Central journal article supplement — eBioMedicine. 2021 Jun 19;69:103453. doi: 10.1016/j.ebiom.2021.103453 (PMC8220552; doi:10.1016/j.ebiom.2021.103453), 2021-06-19
Supplement: mmc1.pdf [file mmc1.pdf]

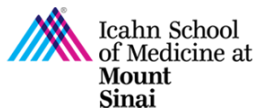

Price, Gabrielle <gabrielle.price@icahn.mssm.edu>

---

<no subject>

3 messages

---

**Hambardzumyan, Dolores** <dolores.hambardzumyan@mssm.edu> Mon, Oct 19, 2020 at 8:41 PM  
To: "drsmedart@windstream.net" <drsmedart@windstream.net>, "Price, Gabrielle (Student)" <gabrielle.price@icahn.mssm.edu>

Dear Dave,

I hope my e-mail finds you well and you are having great fall in Cleveland. I wanted to introduce you to a new student in my collaborator's lab- Gabrielle. She wrote a beautiful review and I am co-author and suggested her to send the figures your way to make them mind blowing like my other lab people's figures. I know that my lab is keeping you busy, and was wondering if you can also take on Gabrielle's figures? Please let us know.

Thank you so so much in advance,

Dolores

---

**drsmedart** <drsmedart@windstream.net> Wed, Oct 21, 2020 at 12:28 AM  
To: "Hambardzumyan, Dolores" <dolores.hambardzumyan@mssm.edu>  
Cc: "Price, Gabrielle (Student)" <gabrielle.price@icahn.mssm.edu>

Hi Dolores,

Happy Fall!

Of course I would be delighted to help Gabrielle and create figures for her review. I want to make sure I get caught up with Alice's, James' and Z's projects, so let me know when you plan to submit the paper!

You have one hard-working lab! I hope everyone can take some time to enjoy the Fall in spite of the Covid situation!

I look forward to hearing from Gabrielle and will be sending Alice, James and Z some proofs to review after the weekend.

Best,  
DS

Sent from my iPhone

[Quoted text hidden]

---

**Price, Gabrielle** <gabrielle.price@icahn.mssm.edu> Wed, Oct 21, 2020 at 11:43 AM  
To: drsmedart <drsmedart@windstream.net>  
Cc: "Hambardzumyan, Dolores" <dolores.hambardzumyan@mssm.edu>

Dear Dave,

Thank you for your willingness to assist with the figures for the literature review. I look forward to working with you. You can expect an email from me within the next one or two days that includes a brief overview of the literature review and drafts of the figures.

Dolores, thanks again for connecting us.

Best Regards,

Gabrielle Price

6/3/2021

Icahn School of Medicine at Mount Sinai Mail - <no subject>

[Quoted text hidden]
